# Supplementary material
Source: PubMed Central journal article supplement (PMC4135503)
Supplement: 114.086918_ajcn086918SupplementaryData1.pdf [file 114.086918_ajcn086918SupplementaryData1.pdf]

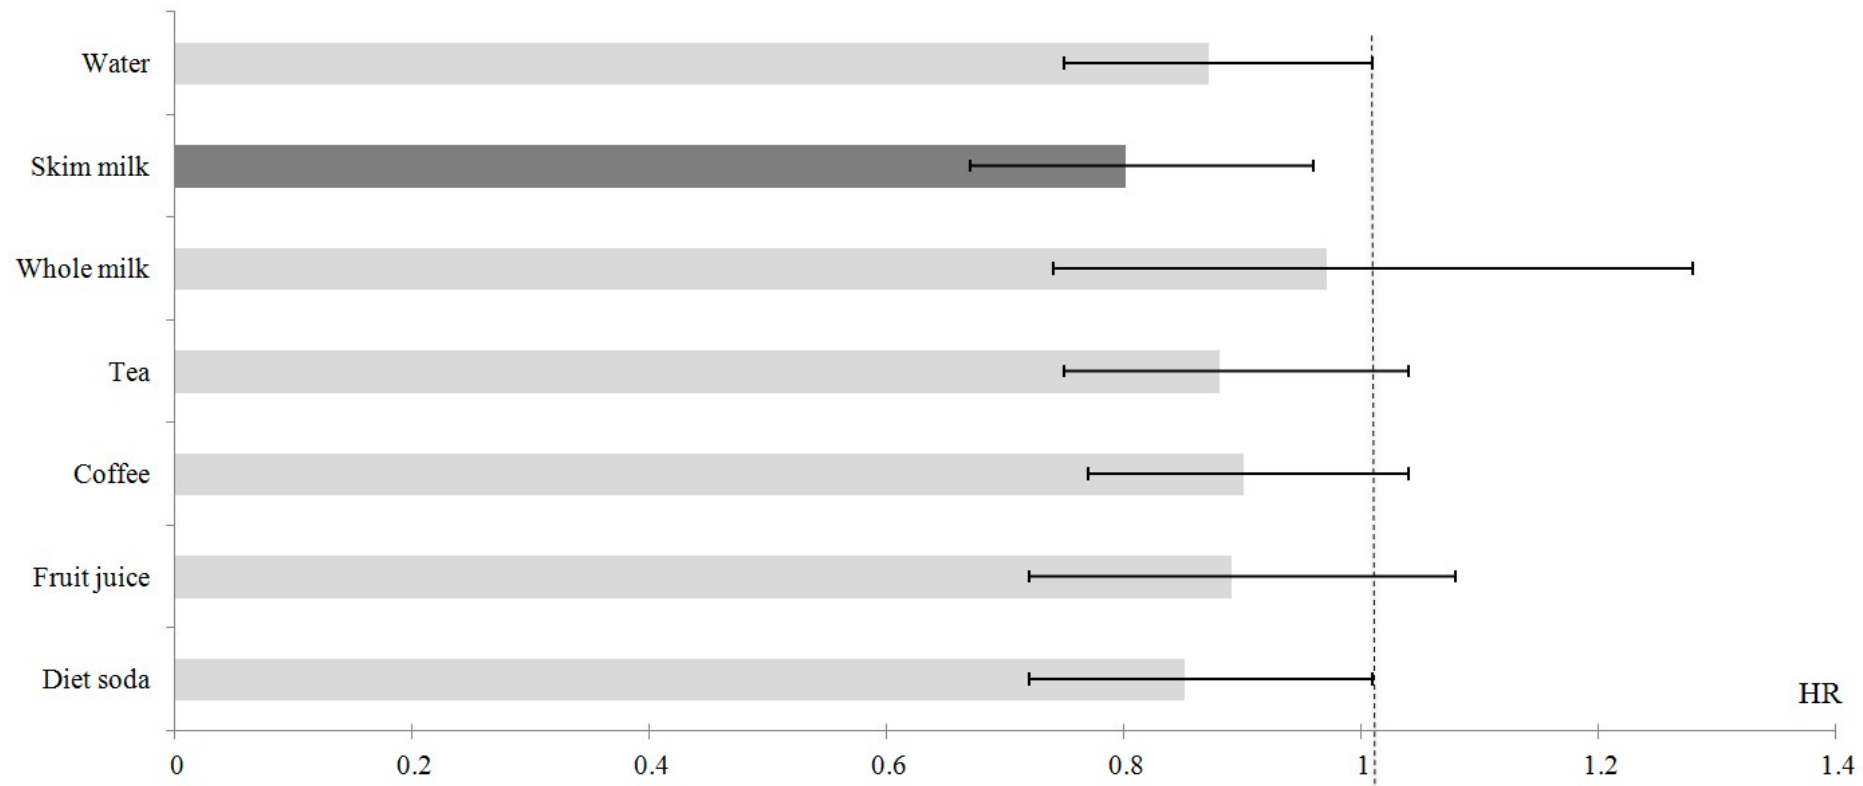

## **SUPPLEMENTAL FIGURE 1**

### **Hazard ratios of seropositive RA with replacement of sugar-sweetened soda by various beverages**

The hazard ratios were calculated using time-varying Cox proportional hazard models.

Results were adjusted for age, census tract median family income (quartiles), cigarette smoking status (never, past, current 1-14 cigarettes/d, current  $\geq 15$  cigarettes/d), alcohol consumption ( $< 5.0$ , 5.0-15.0,  $\geq 15$  g/d), age at menarche ( $< 12$ , 12,  $> 12$  years), parity and breast feeding (nulliparous, parous/no breastfeeding, parous/1–12 months breastfeeding, parous/ $> 12$  months breastfeeding), hormone use (pre-menopausal, post-menopausal with never use, current use and past use), physical activity (0-3, 3-9, 9-18, 18-27,  $\geq 27$  METs /week), body mass index ( $< 20$ , 20-22.9, 23-24.9, 25-29.9,  $\geq 30$  kg/m<sup>2</sup>), multi-vitamin use, healthy eating index (quintiles), diabetes history and total energy (Kcal, quintiles).

The 2 beverages for substitution were entered into the model as continuous variables. The results from 2 cohorts were pooled using an inverse variance-weighted, fixed-effect meta-analysis. Error bars represent 95% CIs of substitution estimates.
